# Supplementary figures and images for: Examining and Modulating Neural Circuits in Psychiatric Disorders With Transcranial Magnetic Stimulation and Electroencephalography: Present Practices and Future Developments
Source: Atypon-hosted journal article supplement (doi:10.1176/appi.ajp.2020.20071050), 2021-03-03

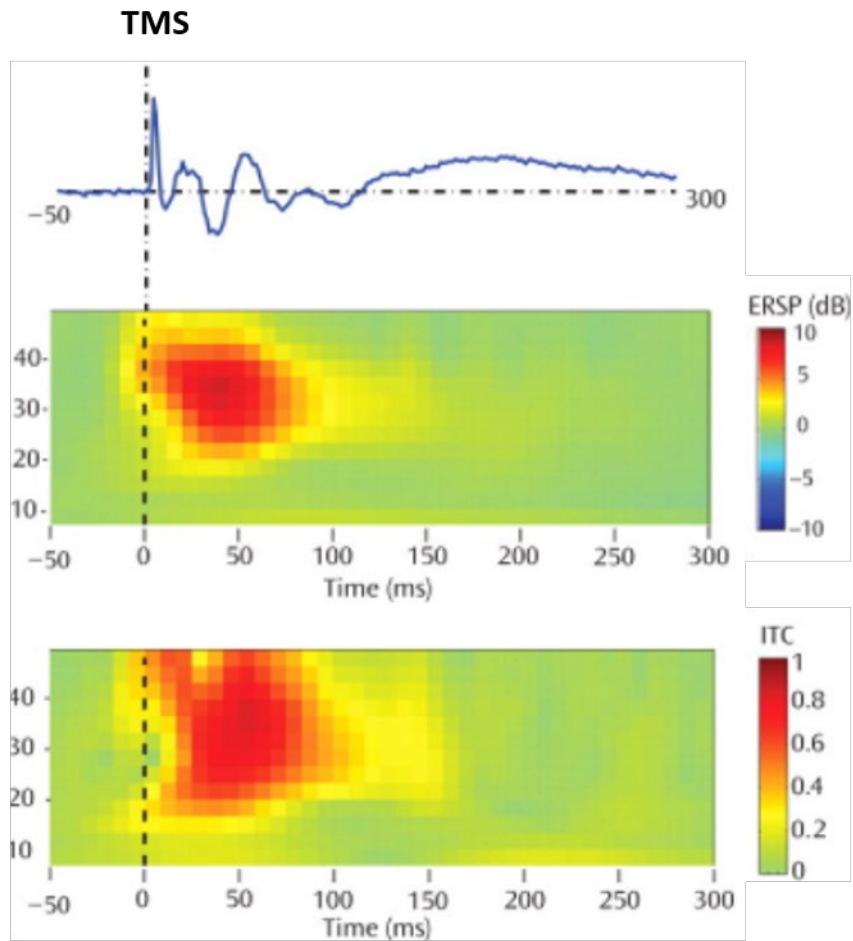

Supp. Fig 1. TMS-evoked EEG response (Top) with related ERSP (middle) and ITC (bottom) activity.

Supplement: appi.ajp.2020.20071050.ds001.pdf [file appi.ajp.2020.20071050.ds001.pdf]
